# Supplementary material
Source: Frontiers journal article supplement (https://www.frontiersin.org/articles/82114)
Supplement: Presentation_2.PDF [file Presentation_2.PDF]

Supplementary Figure 2

Rostral

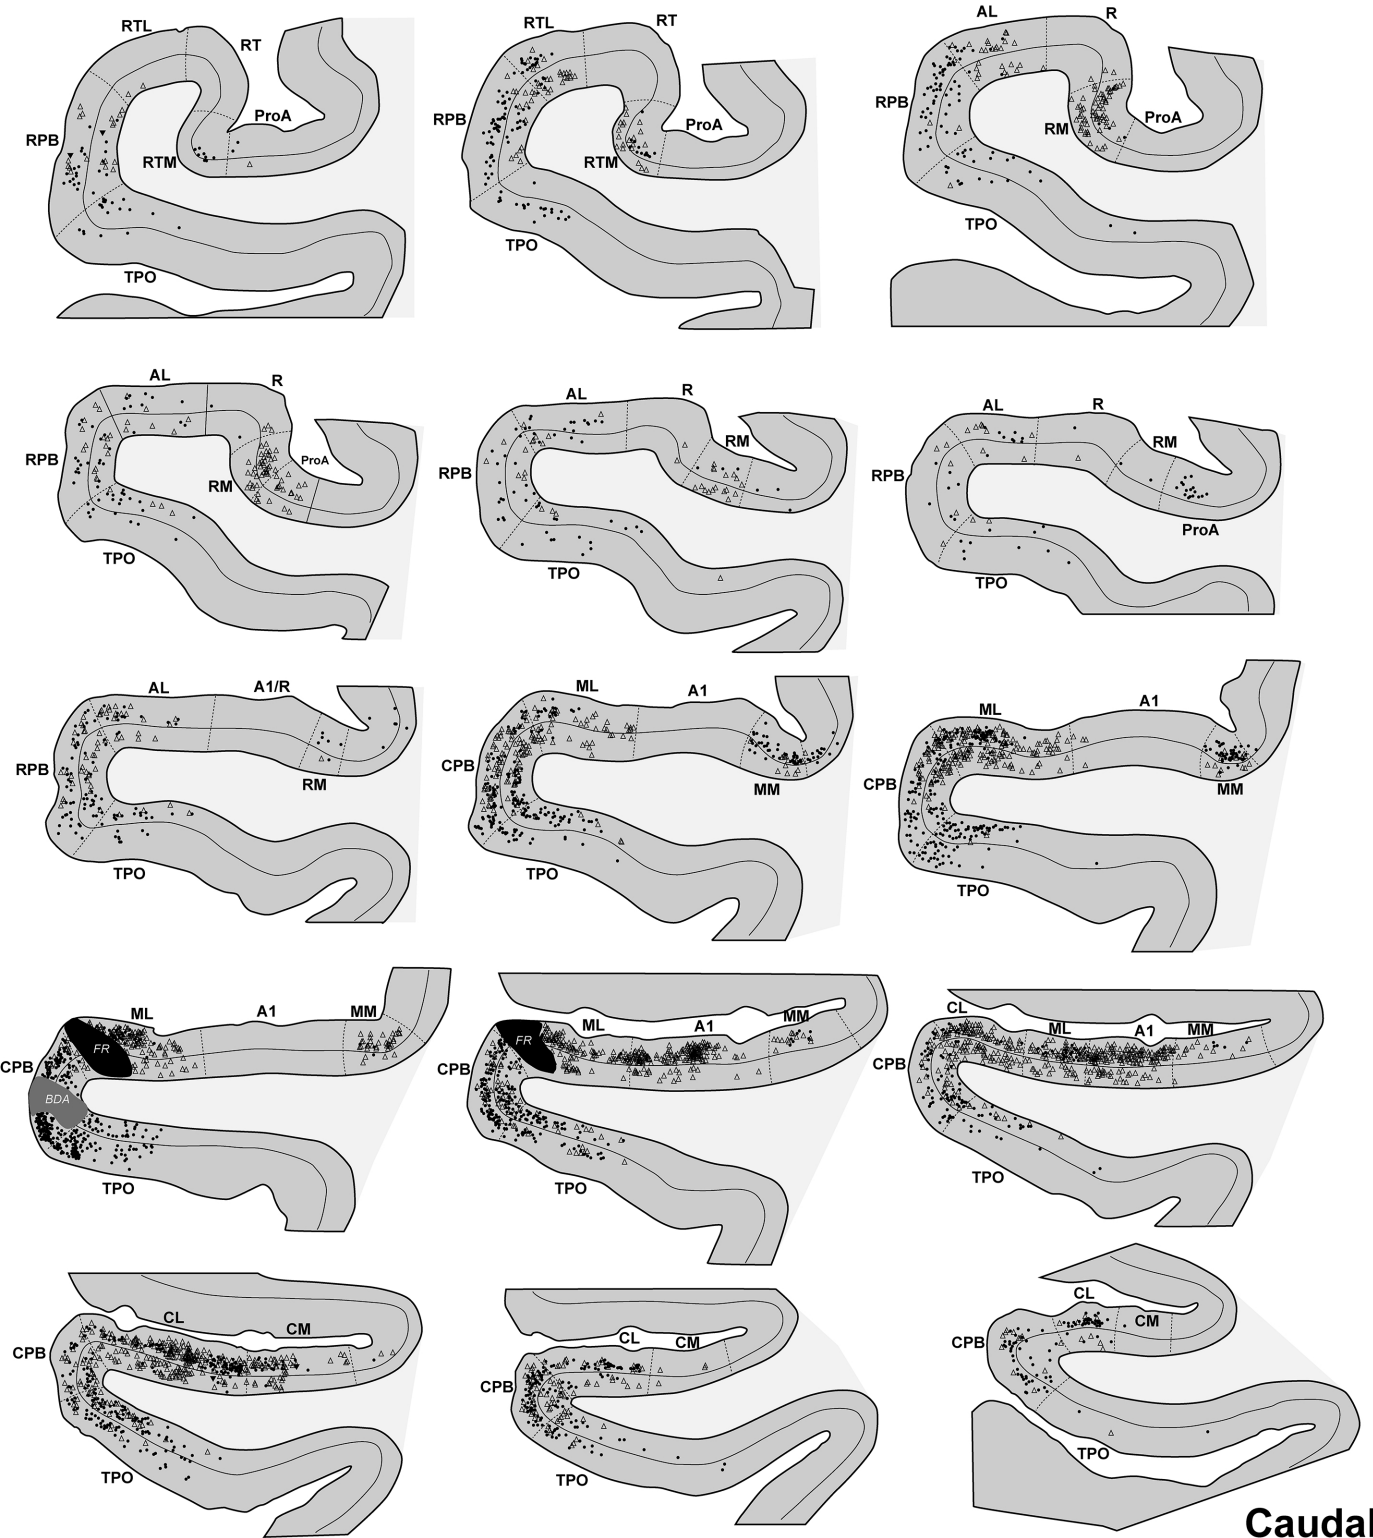

Caudal
